# Supplementary material for: A new simple volatile solid additive triggers morphological optimization and performance stabilization in polymer solar cells
Source: Royal Society of Chemistry journal article supplement (doi:10.1039/d2se00199c), 2022-01-01
Supplement: d2se00199c1.pdf [file d2se00199c1.pdf]

# A new simple volatile solid additive triggers morphological optimization and performance stabilization in polymer solar cells

Zhijie Fu,<sup>‡af</sup> Weiyang Yu,<sup>‡abc</sup> Hang Song,<sup>abd</sup> Guangquan Zhang,<sup>abc</sup> Haiyan Chen,<sup>ab\*</sup> Zhipeng

Kan,<sup>abc</sup> Liuying Du<sup>be</sup>, Jianfeng Li<sup>f\*</sup> and Shirong Lu,<sup>abc\*</sup>

<sup>a</sup> Chongqing Institute of Green and Intelligent Technology, Chinese Academy of Sciences, Chongqing, 400714, China. E-mail: [chenhaiyan@cigit.ac.cn](mailto:chenhaiyan@cigit.ac.cn); [lushirong@cigit.ac.cn](mailto:lushirong@cigit.ac.cn)

<sup>b</sup> Chongqing School, University of Chinese Academy of Sciences, Chongqing 400714, China

<sup>c</sup> University of Chinese Academy of Sciences, Beijing 100049, China

<sup>d</sup> College of Materials Science and Engineering, Chongqing University of Technology, Chongqing, 400054, China

<sup>e</sup> College of Materials Science and Engineering, Chongqing Jiaotong University, Chongqing, 400074, China

<sup>f</sup> School of Electronic and Information Engineering, Lanzhou Jiaotong University, Lanzhou 730070, China. E-mail: [ljjfpyc@163.com](mailto:ljjfpyc@163.com)

<sup>‡</sup> These authors contributed equally to this work.

## 1. Device fabrication

The positive device with ITO/PEDOT:PSS/ PM6:Y6/Phen-NaDPO/Ag was fabricated. The PM6:Y6 organic solar cells were prepared on glass substrates with tin-doped indium oxide (ITO, 15  $\Omega$ /sq) patterned on the surface (device area: 0.1cm<sup>2</sup>). Substrates were prewashed with isopropanol to remove organic residues before immersing in an ultrasonic bath of soap for 15 min. Samples were rinsed in flowing deionized water for 5 min before being sonicated for 15 min each in successive baths of deionized water, acetone and isopropanol. Next, the samples were dried with pressurized nitrogen before being exposed to a UV-ozone plasma for 15 min. PEDOT: PSS was diluted with the same volume of water, a thin layer of PEDOT: PSS (~20 nm) (Clevios AL4083) was spin-coated onto the UV-treated substrates, the PEDOT-coated substrates were subsequently annealed on a hot plate at 120 °C for 20 min, and the substrates were then transferred into the glovebox for active layer deposition. All

solutions were prepared in the glovebox using the donors of PM6 and the acceptor of Y6; The PM6 and Y6 were purchased from organtec. ltd., and the 2,6-Dichloriodobenzene (DCIB) was purchased from Shanghai Titan Technology Co., Ltd.. Optimized devices were obtained by dissolving PM6 and Y6 in chloroform (CF) using a D/A ratio of 1:1.2 total concentration of 17 mg/mL. Note: The as-prepared solutions were stirred overnight at room temperature before being spin coat on the PEDOT:PSS substrates. The active layers were spin-coated at an optimized speed of 3000 rpm for time period of 30s, resulting in films of 110 to 120 nm in thickness. The active layers were then thermal annealing (TA) for 5 min at 110 °C. The next stage is to coat ETL on active layer, about 40 uL Phen-NaDPO solution (0.5 mg/mL in Isopropyl alcohol) was spin-coated at 2000 rpm for 20s. Finally, the samples were placed in a thermal evaporator for evaporation of a 90 nm-thick layer of Silver (Ag) evaporated at  $2 \text{ \AA s}^{-1}$ ; pressure of less than  $2 \times 10^{-6}$  Torr. Following electrode deposition, samples underwent *J-V* testing.

## 2. Device testing and characterization

The current density-voltage (*J-V*) curves of devices were measured using a Keithley 2400 Source Meter in glove box under AM 1.5G ( $100 \text{ mW cm}^{-2}$ ) using a Enlitech solar simulator (purchased from Enli Technology Co., Ltd.). A  $2 \times 2 \text{ cm}^2$  monocrystalline silicon reference cell with KG1 filter (purchased from Enli Tech. Co., Ltd., Taiwan). The external quantum efficiency (EQE) was measured by a certified incident photon to electron conversion (IPCE) equipment (QE-R) from Enli Technology Co., Lt. The light intensity at each wavelength was calibrated using a standard monocrystalline Si photovoltaic cell.

For TPV, the measurement was conducted under 1 sun conditions by illuminating the device with a white light-emitting diode, and the champion device is set to the open-circuit condition. For TPC, the champion device is set to the short-circuit condition in dark. The output signal was collected by key sight oscilloscope. The transient photocurrent (TPC) was testing under the short-circuit condition to explore the time-dependent extraction of photogenerated charge carriers. The 10 ns light plus laser were selected to the light source for steady the photogenerated current density. The devices are otherwise kept in the dark between pulses in order to avoid any influence of pulse frequency on the current responses. The transient photovoltage (TPV) was testing under the open-circuit condition to explore the

photovoltage decay. The intensity of light is 230  $\mu\text{W}/\text{cm}^2$  and the wavelength of light is 520 nm. The light pulse is 10 ns.

The devices were placed in a nitrogen-filled glove box ( $\text{O}_2 < 10$  ppm;  $\text{H}_2\text{O} < 10$  ppm) and performed efficiency tests every two days under a simulated solar light source (a Keithley 2400 source meter and an AAA grade solar simulator (Sirius-SS150A-D, Zolix Ltd.) along with AM 1.5G spectra whose intensity was corrected by a certified standard silicon solar cell (Certificate No.: GXtc2017-1280, NIM) at 1000  $\text{W}/\text{m}^2$ ).

The space-charge-limited current (SCLC) method for testing electron mobility and hole mobility was according to our previous article (*J. Mater. Chem. C*, 2018, **6**, 11015).

Ultraviolet–visible light (UV-vis) absorption spectra were recorded on a Perkin Elmer Lambda 365 spectrophotometer. Topographic images of the films were obtained on a Bruker Dimension Edge atomic force microscopy (AFM). Transmission electron microscope (TEM) studies were conducted with an FEI Tecnai F20 electron microscope. Thermogravimetric analysis (TGA) was carried out on a METTLER TOLEDO TGA/DSC 1 thermogravimetric analyzer.

The contact angles of the films were performed on a DSA-100 (KRUSSE Germany) contact angle meter. Then the surface free energy was calculated by Owens-Wendt method.

$$\gamma_L \times (1 + \cos \theta) = 2 \times (\gamma_L^d \cdot \gamma_{sv}^d)^{1/2} + 2 \times (\gamma_L^p \cdot \gamma_{sv}^p)^{1/2} \quad (1)$$

where  $\gamma_L$  and  $\gamma_S$  are surface free energy of the probe liquid and sample, respectively,  $\theta$  is the contact angle of the sample. The average contact angles of two liquids (deionized water and formamide) on the various neat films were measured and the results (Test three times separately) in Table S1, and the average contact angles and surface energy parameters are summarized in Table 2 (in Manuscript). Then calculate the Flory-Huggins interaction parameter  $\chi_{\text{donor-acceptor}}$  for blend to show the binary miscibility from

$$K(\gamma_{\text{donor}}^{1/2} - \gamma_{\text{acceptor}}^{1/2})^2 \quad (2)$$

where  $\gamma$  is the surface energy of the material, K is the proportionality constant.

### 3. Supplemental figures

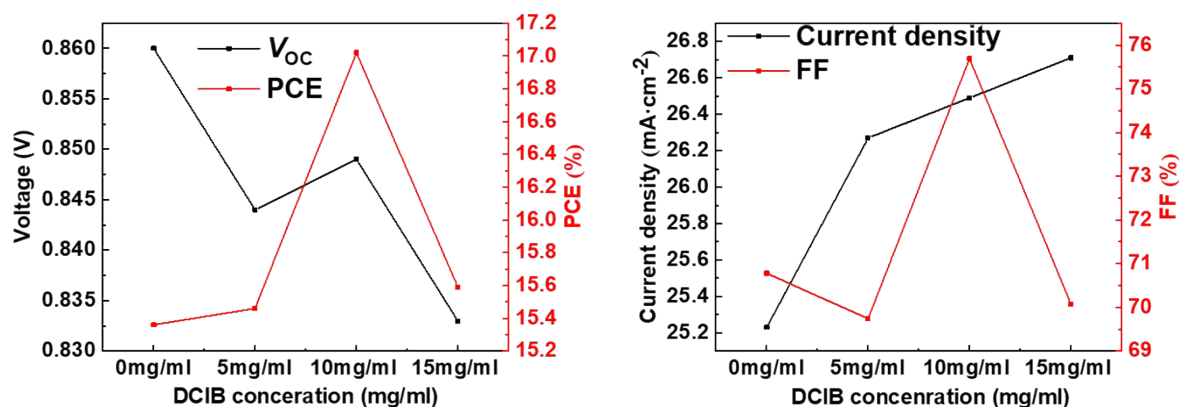

**Fig. S1.** Photovoltaic performances of PM6:Y6 based OSCs with different concentrations of DCIB.

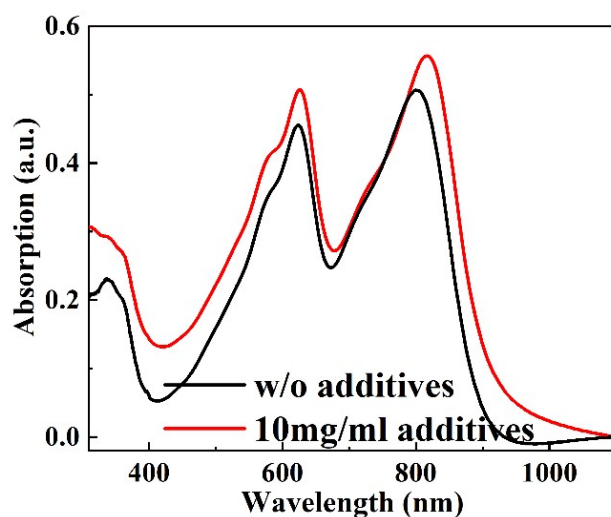

**Fig. S2.** UV-vis of PM6:Y6 blended films with (red) or with-out (black) DCIB additives.

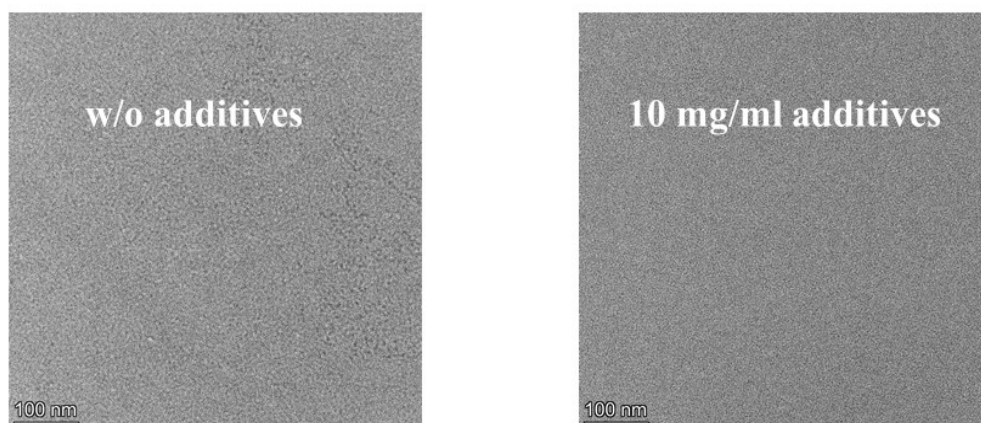

**Fig. S3.** TEM of PM6:Y6-based OSCs with different concentration of DCIB additive.

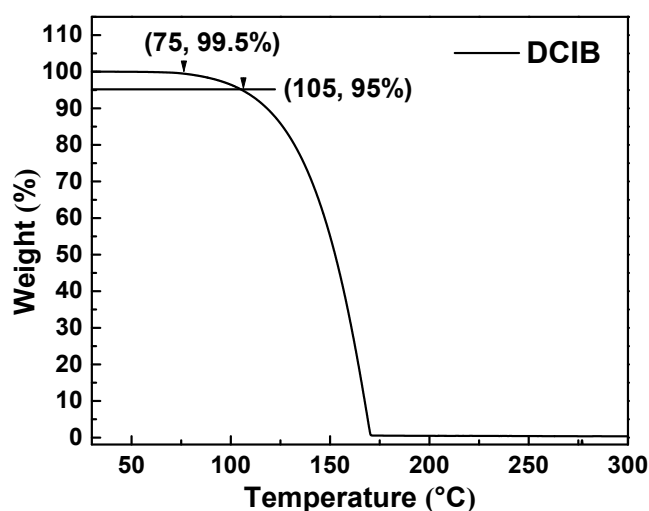

**Fig. S4.** TGA curve of DCIB additive with thermal balance under the protection of nitrogen at a heating rate of  $10\text{ }^{\circ}\text{C}\cdot\text{min}^{-1}$ .

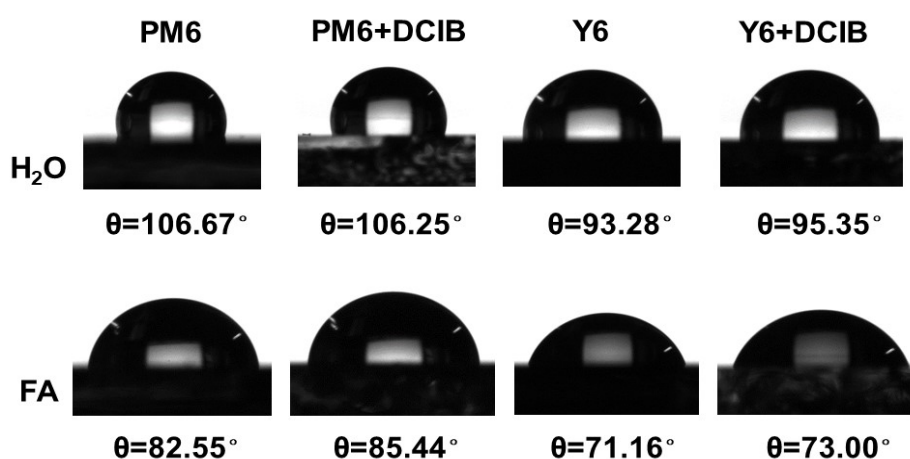

**Fig. S5** The contact angles of the pristine and blended materials in deionized water (H<sub>2</sub>O) and formamide (FA).

#### 4. Supplemental tables

**Table S1.** PM6:Y6 based OSC devices with different concentrations of DCIB.

| Conditions                                   | V <sub>OC</sub> (V) | J <sub>SC</sub> (mA·cm <sup>-2</sup> ) | FF (%)     | <sup>(b)</sup> PCE (%) |
|----------------------------------------------|---------------------|----------------------------------------|------------|------------------------|
| <sup>(a)</sup> w/o additives                 | 0.860±0.001         | 25.23±0.12                             | 70.78±0.32 | 15.36±0.20             |
| 1 mg·mL <sup>-1</sup> DCIB (TA 110°C 5 min)  | 0.844±0.001         | 26.27±0.20                             | 69.74±0.27 | 15.46±0.20             |
| 10 mg·mL <sup>-1</sup> DCIB (TA 110°C 5 min) | 0.849±0.001         | 26.49±0.06                             | 75.69±0.21 | 17.02±0.14             |

|                                               |             |            |            |            |
|-----------------------------------------------|-------------|------------|------------|------------|
| 15 mg·mL <sup>-1</sup> DCIB (TA 110°C 5 min)  | 0.833±0.001 | 26.71±0.19 | 70.08±0.33 | 15.59±0.20 |
| 10 mg·mL <sup>-1</sup> DCIB (TA 110°C 10 min) | 0.834±0.001 | 25.91±0.20 | 68.78±0.19 | 14.86±0.20 |

(a) Control devices (w/o additives) represent unadulterated additive treatment devices; (b) the average of 12 individual devices.

**Table S2.** Summarized  $J_{\text{sat}}$  and  $P$  (E,T) treated under different conditions.

| additives                   | $J_{\text{sat}}$ (mA·cm <sup>-2</sup> ) | $P$ (E,T) (%) |
|-----------------------------|-----------------------------------------|---------------|
| w/o                         | 25.86                                   | 97.82         |
| 10 mg·mL <sup>-1</sup> DCIB | 27.15                                   | 96.50         |

**Table S3.** Summarized  $\mu_e$  and  $\mu_h$  treated under different conditions.

| additives                   | $\mu_e$ (cm <sup>2</sup> V <sup>-1</sup> s <sup>-1</sup> )            | $\mu_h$ (cm <sup>2</sup> V <sup>-1</sup> s <sup>-1</sup> )            | $\mu_h/\mu_e$ |
|-----------------------------|-----------------------------------------------------------------------|-----------------------------------------------------------------------|---------------|
| w/o                         | $3.50 \times 10^{-4}$ cm <sup>2</sup> V <sup>-1</sup> s <sup>-1</sup> | $7.32 \times 10^{-4}$ cm <sup>2</sup> V <sup>-1</sup> s <sup>-1</sup> | 2.08          |
| 10 mg·mL <sup>-1</sup> DCIB | $5.34 \times 10^{-4}$ cm <sup>2</sup> V <sup>-1</sup> s <sup>-1</sup> | $8.18 \times 10^{-4}$ cm <sup>2</sup> V <sup>-1</sup> s <sup>-1</sup> | 1.53          |

**Table S4.** Summarized contact angles of the materials.

| Films    | Contact angle (deg) |               |
|----------|---------------------|---------------|
|          | H <sub>2</sub> O    | Formamide, FA |
| PM6      | 106.72              | 82.34         |
|          | 106.70              | 82.64         |
|          | 106.58              | 82.67         |
| PM6+DCIB | 106.45              | 85.00         |
|          | 106.11              | 85.80         |
|          | 106.18              | 85.51         |
| Y6       | 93.12               | 71.18         |
|          | 93.29               | 71.20         |
|          | 93.42               | 71.10         |

|         |       |       |
|---------|-------|-------|
| Y6+DCIB | 95.52 | 72.70 |
|         | 95.22 | 72.70 |
|         | 95.31 | 73.60 |
